# Supplementary material for: The Impact of Prepartum Depression and Birth Experience on Postpartum Mother-Infant Bonding: A Longitudinal Path Analysis
Source: PubMed Central journal article supplement (PMC9189288; doi:10.3389/fpsyt.2022.815822), 2022-05-30
Supplement: Table_1.pdf [file Table_1.pdf]

## *Supplementary Material*

### 1 Sample Characteristics

**Supplementary Table 1** Sample Characteristics.

|                                                                             |              |
|-----------------------------------------------------------------------------|--------------|
| All participants, n (%)                                                     | 354 (100.0)  |
| Demographic variables                                                       |              |
| <sup>b</sup> Age mean in years, <i>M</i> ( <i>SD</i> )                      | 31.32 (4.86) |
| <sup>a</sup> Parity                                                         |              |
| Primipara, n (%)                                                            | 189 (53.4)   |
| Multipara, n (%)                                                            | 138 (39.0)   |
| <sup>a</sup> Highest educational level                                      |              |
| Secondary school diploma, n (%)                                             | 39 (11.0)    |
| Completed vocational training, n (%)                                        | 89 (25.1)    |
| High school diploma, n (%)                                                  | 33 (9.3)     |
| Academic degree, n (%)                                                      | 164 (46.3)   |
| Other qualification, n (%)                                                  | 28 (7.9)     |
| Treatment of mental disorder                                                |              |
| <sup>a</sup> Mothers with self-reported (prior) treatment, n (%)            | 54 (15.3)    |
| <sup>a</sup> Mothers without self-reported (prior) treatment, n (%)         | 298 (84.2)   |
| <sup>b</sup> Mothers with self-reported (prior) treatment, n (%)            | 25 (19.1)    |
| <sup>b</sup> Mothers without self-reported (prior) treatment, n (%)         | 106 (80.9)   |
| Birth-related variables                                                     |              |
| <sup>a</sup> Gestation week, <i>M</i> ( <i>SD</i> )                         | 26.11 (9.32) |
| <sup>a</sup> Pregnancy Trimester                                            |              |
| First trimester (1 <sup>st</sup> -12 <sup>th</sup> week gestation), n (%)   | 32 (9.0)     |
| Second trimester (13 <sup>th</sup> -28 <sup>th</sup> week gestation), n (%) | 163 (46.0)   |
| Third Trimester (29 <sup>th</sup> -40 <sup>th</sup> week gestation), n (%)  | 154 (43.5)   |
| Birth complications                                                         |              |
| <sup>a</sup> Previous experience with birth complications, n (%)            | 50 (14.1)    |
| <sup>b</sup> Complications during the last birth, n (%)                     | 57 (43.5)    |
| <sup>b</sup> No complications during the last birth, n (%)                  | 70 (53.4)    |
| <sup>b</sup> Age of the newborn in weeks, <i>M</i> ( <i>SD</i> )            | 8.88 (5.48)  |
| Under to 2nd week of life), n (%)                                           | 6 (4.6)      |
| Under 2 months (2nd-8th week of life), n (%)                                | 88 (67.2)    |
| Above 2 months (9th-24th week of life), n (%)                               | 33 (25.2)    |
| <sup>b</sup> Difficulties Postpartum                                        |              |
| Difficulties postpartum, n (%)                                              | 39 (29.8)    |
| No difficulties postpartum, n (%)                                           | 91 (69.5)    |

<sup>a</sup>at prenatal survey (with total *N* = 354)

<sup>b</sup>at postpartum survey (with total *N* = 131)

<sup>c</sup>Previous experience of birth complications includes a primipara's experience of abortion

<sup>d</sup>Dichotomous variable which could include any situation the participants experienced as stressful after birth
