# Supplementary material for: The Impact of Prepartum Depression and Birth Experience on Postpartum Mother-Infant Bonding: A Longitudinal Path Analysis
Source: PubMed Central journal article supplement (PMC9189288; doi:10.3389/fpsyt.2022.815822), 2022-05-30
Supplement: Table_2.pdf [file Table_2.pdf]

2 Measurement model with complete cases ( $n = 131$ )Supplementary Table 2 Measurement model with complete cases ( $n = 131$ ).

| Variables    | Original Sample<br>(O) | Sample Mean<br>(M) | Standard Deviation<br>(STDEV) | T Statistics<br>( O/STDEV ) | p Value |
|--------------|------------------------|--------------------|-------------------------------|-----------------------------|---------|
| <b>PBQ</b>   |                        |                    |                               |                             |         |
| Item 1       | 0.770                  | 0.760              | 0.057                         | 13.486                      | <0.001  |
| Item 2       | 0.570                  | 0.555              | 0.099                         | 5.762                       | <0.001  |
| Item 3       | 0.650                  | 0.639              | 0.086                         | 7.579                       | <0.001  |
| Item 4       | 0.353                  | 0.362              | 0.144                         | 2.443                       | 0.015   |
| Item 5       | 0.669                  | 0.667              | 0.056                         | 12.048                      | <0.001  |
| Item 6       | 0.509                  | 0.514              | 0.108                         | 4.705                       | <0.001  |
| Item 7       | 0.395                  | 0.346              | 0.183                         | 2.154                       | 0.031   |
| Item 8       | 0.529                  | 0.511              | 0.116                         | 4.562                       | <0.001  |
| Item 9       | 0.632                  | 0.630              | 0.081                         | 7.802                       | <0.001  |
| Item 10      | 0.682                  | 0.680              | 0.075                         | 9.143                       | <0.001  |
| Item 11      | 0.580                  | 0.578              | 0.093                         | 6.252                       | <0.001  |
| Item 12      | 0.632                  | 0.626              | 0.067                         | 9.376                       | <0.001  |
| Item 13      | 0.587                  | 0.569              | 0.094                         | 6.264                       | <0.001  |
| Item 14      | 0.418                  | 0.421              | 0.081                         | 5.129                       | <0.001  |
| Item 15      | 0.710                  | 0.707              | 0.058                         | 12.139                      | <0.001  |
| Item 16      | 0.451                  | 0.452              | 0.096                         | 4.707                       | <0.001  |
| <b>EPDS1</b> |                        |                    |                               |                             |         |
| Item 1       | 0.536                  | 0.525              | 0.097                         | 5.530                       | <0.001  |
| Item 2       | 0.371                  | 0.362              | 0.118                         | 3.151                       | 0.002   |
| Item 3       | 0.528                  | 0.525              | 0.082                         | 6.410                       | <0.001  |
| Item 4       | 0.550                  | 0.542              | 0.084                         | 6.569                       | <0.001  |
| Item 5       | 0.718                  | 0.712              | 0.062                         | 11.669                      | <0.001  |
| Item 6       | 0.664                  | 0.659              | 0.059                         | 11.197                      | <0.001  |
| Item 7       | 0.640                  | 0.632              | 0.071                         | 9.074                       | <0.001  |
| Item 8       | 0.793                  | 0.788              | 0.040                         | 20.005                      | <0.001  |
| Item 9       | 0.733                  | 0.727              | 0.061                         | 12.083                      | <0.001  |
| Item 10      | 0.327                  | 0.321              | 0.091                         | 3.590                       | <0.001  |
| <b>SIL</b>   |                        |                    |                               |                             |         |
| Item 1       | 0.703                  | 0.699              | 0.063                         | 11.071                      | <0.001  |
| Item 3       | 0.718                  | 0.713              | 0.064                         | 11.173                      | <0.001  |
| Item 5       | 0.781                  | 0.776              | 0.054                         | 14.449                      | <0.001  |
| Item 6       | 0.684                  | 0.680              | 0.065                         | 10.449                      | <0.001  |
| Item 7       | 0.780                  | 0.776              | 0.049                         | 16.062                      | <0.001  |
| Item 9       | 0.818                  | 0.816              | 0.040                         | 20.685                      | <0.001  |
| Item 10      | 0.824                  | 0.820              | 0.035                         | 23.734                      | <0.001  |
| Item 12      | 0.551                  | 0.546              | 0.085                         | 6.517                       | <0.001  |
| Item 15      | 0.472                  | 0.468              | 0.086                         | 5.490                       | <0.001  |
| Item 16      | 0.276                  | 0.273              | 0.103                         | 2.675                       | 0.007   |
| Item 18      | 0.508                  | 0.498              | 0.096                         | 5.314                       | <0.001  |
| Item 19      | 0.335                  | 0.334              | 0.098                         | 3.425                       | 0.001   |
| <b>EPDS2</b> |                        |                    |                               |                             |         |
| Item 1       | 0.728                  | 0.729              | 0.047                         | 15.440                      | <0.001  |
| Item 2       | 0.566                  | 0.569              | 0.067                         | 8.485                       | <0.001  |
| Item 3       | 0.774                  | 0.772              | 0.035                         | 22.314                      | <0.001  |
| Item 4       | 0.645                  | 0.642              | 0.054                         | 12.011                      | <0.001  |
| Item 5       | 0.711                  | 0.709              | 0.058                         | 12.183                      | <0.001  |
| Item 6       | 0.510                  | 0.506              | 0.085                         | 6.033                       | <0.001  |
| Item 7       | 0.571                  | 0.564              | 0.083                         | 6.903                       | <0.001  |
| Item 8       | 0.727                  | 0.724              | 0.047                         | 15.463                      | <0.001  |
| Item 9       | 0.744                  | 0.745              | 0.048                         | 15.538                      | <0.001  |
| Item 10      | 0.390                  | 0.394              | 0.101                         | 3.848                       | <0.001  |

Supplementary Table 2 Outer (factor) loadings of variables on their latent constructs
