# Supplementary material for: The Impact of Prepartum Depression and Birth Experience on Postpartum Mother-Infant Bonding: A Longitudinal Path Analysis
Source: PubMed Central journal article supplement (PMC9189288; doi:10.3389/fpsyt.2022.815822), 2022-05-30
Supplement: Table_3.pdf [file Table_3.pdf]

### 3 Measurement model imputing missing data ( $n = 354$ )

**Supplementary Table 3** Measurement model imputing missing data ( $n = 354$ )

| Variables    | Original Sample<br>(O) | Sample Mean<br>(M) | Standard Deviation<br>(STDEV) | T Statistics<br>( O/STDEV ) | <i>p</i> Value |
|--------------|------------------------|--------------------|-------------------------------|-----------------------------|----------------|
| <b>PBQ</b>   |                        |                    |                               |                             |                |
| Item 1       | 0.731                  | 0.729              | 0.029                         | 25.048                      | <0.001         |
| Item 2       | 0.422                  | 0.416              | 0.060                         | 7.057                       | <0.001         |
| Item 3       | 0.663                  | 0.661              | 0.039                         | 16.996                      | <0.001         |
| Item 4       | 0.297                  | 0.302              | 0.097                         | 3.070                       | 0.002          |
| Item 5       | 0.727                  | 0.727              | 0.031                         | 23.141                      | <0.001         |
| Item 6       | 0.573                  | 0.576              | 0.070                         | 8.163                       | <0.001         |
| Item 7       | 0.231                  | 0.211              | 0.104                         | 2.224                       | 0.026          |
| Item 8       | 0.441                  | 0.437              | 0.061                         | 7.202                       | <0.001         |
| Item 9       | 0.615                  | 0.614              | 0.063                         | 9.716                       | <0.001         |
| Item 10      | 0.765                  | 0.765              | 0.036                         | 20.988                      | <0.001         |
| Item 11      | 0.631                  | 0.631              | 0.043                         | 14.639                      | <0.001         |
| Item 12      | 0.550                  | 0.550              | 0.046                         | 11.990                      | <0.001         |
| Item 13      | 0.360                  | 0.354              | 0.070                         | 5.168                       | <0.001         |
| Item 14      | 0.517                  | 0.518              | 0.052                         | 9.896                       | <0.001         |
| Item 15      | 0.615                  | 0.614              | 0.040                         | 15.203                      | <0.001         |
| Item 16      | 0.464                  | 0.463              | 0.066                         | 7.067                       | <0.001         |
| <b>EPDS1</b> |                        |                    |                               |                             |                |
| Item 1       | 0.614                  | 0.612              | 0.043                         | 14.202                      | <0.001         |
| Item 2       | 0.458                  | 0.454              | 0.060                         | 7.662                       | <0.001         |
| Item 3       | 0.529                  | 0.527              | 0.049                         | 10.823                      | <0.001         |
| Item 4       | 0.540                  | 0.538              | 0.051                         | 10.691                      | <0.001         |
| Item 5       | 0.721                  | 0.719              | 0.035                         | 20.366                      | <0.001         |
| Item 6       | 0.649                  | 0.647              | 0.036                         | 18.171                      | <0.001         |
| Item 7       | 0.611                  | 0.609              | 0.046                         | 13.304                      | <0.001         |
| Item 8       | 0.783                  | 0.780              | 0.025                         | 31.410                      | <0.001         |
| Item 9       | 0.722                  | 0.719              | 0.034                         | 21.282                      | <0.001         |
| Item 10      | 0.354                  | 0.353              | 0.055                         | 6.440                       | <0.001         |
| <b>SIL</b>   |                        |                    |                               |                             |                |
| Item 1       | 0.302                  | 0.295              | 0.115                         | 2.635                       | 0.008          |
| Item 3       | 0.398                  | 0.392              | 0.109                         | 3.666                       | <0.001         |
| Item 5       | 0.320                  | 0.313              | 0.122                         | 2.619                       | 0.009          |
| Item 6       | 0.402                  | 0.400              | 0.083                         | 4.870                       | <0.001         |
| Item 7       | 0.312                  | 0.305              | 0.122                         | 2.547                       | 0.011          |
| Item 9       | 0.813                  | 0.808              | 0.035                         | 22.971                      | <0.001         |
| Item 10      | 0.871                  | 0.866              | 0.019                         | 45.652                      | <0.001         |
| Item 12      | 0.675                  | 0.670              | 0.047                         | 14.396                      | <0.001         |
| Item 15      | 0.589                  | 0.585              | 0.053                         | 11.054                      | <0.001         |
| Item 16      | 0.569                  | 0.565              | 0.067                         | 8.465                       | <0.001         |
| Item 18      | 0.174                  | 0.170              | 0.106                         | 1.643                       | 0.101          |
| Item 19      | 0.595                  | 0.592              | 0.068                         | 8.732                       | <0.001         |
| <b>EPDS2</b> |                        |                    |                               |                             |                |
| Item 1       | 0.720                  | 0.720              | 0.027                         | 26.673                      | <0.001         |
| Item 2       | 0.469                  | 0.470              | 0.042                         | 11.264                      | <0.001         |
| Item 3       | 0.805                  | 0.804              | 0.019                         | 43.093                      | <0.001         |
| Item 4       | 0.689                  | 0.688              | 0.034                         | 20.054                      | <0.001         |
| Item 5       | 0.759                  | 0.757              | 0.030                         | 25.699                      | <0.001         |
| Item 6       | 0.473                  | 0.471              | 0.056                         | 8.481                       | <0.001         |
| Item 7       | 0.522                  | 0.522              | 0.042                         | 12.532                      | <0.001         |
| Item 8       | 0.745                  | 0.744              | 0.025                         | 29.254                      | <0.001         |
| Item 9       | 0.709                  | 0.710              | 0.031                         | 23.213                      | <0.001         |
| Item 10      | 0.183                  | 0.186              | 0.074                         | 2.468                       | 0.014          |

**Supplementary Table 3** Outer (factor) loadings of variables on their latent construct.
